# Supplementary material for: Assessing product adulteration in natural health products for laxative yielding plants, Cassia, Senna, and Chamaecrista, in Southern India using DNA barcoding
Source: Springer Nature journal article supplement (doi:10.1007/s00414-014-1120-z), 2014-11-26
Supplement: 414_2014_1120_MOESM2_ESM.docx [file 414_2014_1120_MOESM2_ESM.docx]

**Supplementary Table 2** Details of herbal NHP samples collected from different parts of South India used in the analysis

| S.No | Location of Shops/State | Sonnamukhi  (*S. alexandrina*)  Voucher Nos. | Avarai  (*S. auriculata*)  Voucher Nos. | Amalthasphali  (*C. fistula*)  Voucher Nos. | Thagarai  (*S. tora*)  Voucher Nos. |
| --- | --- | --- | --- | --- | --- |
| 1 | Bangalore/Karnataka | HAS77, 120 | HAS70, 102 | HAS73, 95, 74, 127 | HAS90 |
| 2 | Devanagari/Karnataka | HAS225 | - | - | - |
| 3 | Sirsi/Karnataka | HAS335 | HAS338 | HAS343 | HAS332 |
| 4 | Mysore/Karnataka | HAS336 | HAS339 | HAS344 | HAS333 |
| 5 | Belgaum/Karnataka | HAS337 | HAS340 | HAS345 | HAS334 |
| 6 | Chennai/Tamil Nadu | HAS158, 196 | - | - | HAS184 |
| 7 | Tambaram/Tamil Nadu | HAS211 | - | - | HAS212 |
| 8 | Salem/Tamil Nadu | HAS301 | HAS300 | - | HAS293 |
| 9 | Trichy/Tamil Nadu | HAS315 | HAS314 | - | HAS310 |
| 10 | Tanjore/Tamil Nadu | HAS318 | HAS317 | HAS341 | HAS316 |
| 11 | Coimbatore/Tamil Nadu | HAS330 | HAS329 | HAS342 | HAS326 |
| 12 | Erode/Tamil Nadu | HAS 346 | HAS350 | HAS349 | - |
| 13 | Tuticorin/Tamil Nadu | HAS 347 | HAS351 | - | HAS348 |
| 14 | Calicut/Kerala | HAS259 | - | HAS40 | - |
| 15 | NRL*/Karnataka | HAS 257,258, 260,261,262,303,304,305 | - | - | - |
| 16 | Vaniyambadi/Tamil Nadu | - | HAS133 | - | - |
